# Supplementary material
Source: HighWire-hosted journal article supplement (https://diabetes.diabetesjournals.org/content/suppl/2005/10/26/54.11.3126)
Supplement: db0536OnlineAppendixTables.pdf [file db0536OnlineAppendixTables.pdf]

**Supplementary Material**  
**S1/ Primer sequences and amplification conditions for QMPSE**

| Gene/Exon             | Primer sequence (5' to 3') *          |                                        | Concentration †<br>μM | Amplicon size ‡<br>(bp) |
|-----------------------|---------------------------------------|----------------------------------------|-----------------------|-------------------------|
|                       | Forward §                             | Reverse                                |                       |                         |
| <b>Multiplex 1   </b> |                                       |                                        |                       |                         |
| TCF2/exon 3           | <u>CGTTAGATAGATTCAACCAGACAGTCCAGA</u> | <u>GATAGGGTTATCTCTTCCTTGCTGGGGTTC</u>  | 0.4                   | 258                     |
| TCF2/exon 4           | <u>CGTTAGATAGCTGGGCTCCAACCTTGTC</u>   | <u>GATAGGGTTAGACAGCTTGTTGGAGGAGA</u>   | 0.15                  | 208                     |
| TCF2/exon 5           | <u>CGTTAGATAGGAGTGCCTACAGCCAG</u>     | <u>GATAGGGTTAATCAGGTGAGAGGAGATTG</u>   | 0.3                   | 174                     |
| TCF2/exon 6           | <u>CGTTAGATAGAGTCTCAGGAGGAGGTTTGC</u> | <u>GATAGGGTTAATTGCCATGACTCCAGAGAG</u>  | 0.15                  | 140                     |
| TCF2/exon 7           | <u>CGTTAGATAGTCAACACCTCCCAAGCACA</u>  | <u>GATAGGGTTATGAGTCACAGCTGCCATGA</u>   | 0.4                   | 197                     |
| TCF2/exon 8           | <u>CGTTAGATAGGTACGCACACAAGCAGGAAC</u> | <u>GATAGGGTTATTGAAGACATGTTGGTGAGTG</u> | 0.15                  | 130                     |
| <i>TCF1/exon 3</i>    | <u>CGTTAGATAGTGATGAGCTACCAACCAAGA</u> | <u>GATAGGGTTAGAGTCACCTTCCCCTTCC</u>    | 0.3                   | 235                     |
| <b>Multiplex 2 #</b>  |                                       |                                        |                       |                         |
| TCF2/exon 1           | AACTTCGGGGTGAAGCTG                    | AGGATGGGAGGTGTGTCATA                   | 0.5                   | 164                     |
| TCF2/exon 2           | TGTCTAGTGAGGACCCTTGG                  | GGATCTCTCGTTGCTTTCTG                   | 0.3                   | 201                     |
| <i>TCF1/exon 3</i>    | <u>CGTTAGATAGTGATGAGCTACCAACCAAGA</u> | <u>GATAGGGTTAGAGTCACCTTCCCCTTCC</u>    | 0.3                   | 235                     |

\* 5' forward and reverse extensions are underlined

† forward and reverse used equimolar

‡ including 5' extension, if any

§ The forward primer was 5' end-labeled with 6-FAM fluorochrome

|| Multiplex 1 PCR was performed in a 30 μl reaction mixture containing 0.2 mM each dNTP, 2 mM MgCl<sub>2</sub>, 2.5% DMSO, 2 U TaqGold DNA polymerase (Applied Biosystems), 0.15-0.4 μM each primer and 20 ng of genomic DNA. The amplification conditions consisted of an initial step of denaturation at 94°C for 12 min, followed by 24 cycles of denaturation at 94°C for 20 sec, annealing at 54°C for 20 sec and extension at 72°C for 20 sec. A final extension was performed at 72°C for 10 min.

# Multiplex 2 PCR was performed in a 30 μl reaction mixture containing 0.2 mM each dNTP, 2 mM MgCl<sub>2</sub>, 5% DMSO, 1M betaine, 2 U TaqGold DNA polymerase (Applied Biosystems), 0.3-0.5 μM of each primer and 20 ng of genomic DNA. The amplification conditions consisted of an initial step of denaturation at 95°C for 12 min, followed by 24 cycles denaturation at 95°C for 45 sec, annealing at 54°C for 45 sec and extension at 72°C for 45 sec. A final extension was performed at 72°C for 10 min.

## S2/ Primer sequences and amplification conditions for real-time quantitative PCR based on SYBR-Green I fluorescence

| Gene/Exon          | Primer sequence (5' to 3') |                        | Amplicon size (bp) |
|--------------------|----------------------------|------------------------|--------------------|
|                    | Forward                    | Reverse                |                    |
| TCF2/exon 1        | AACTTCGGGGTGAAGCTG         | AGGATGGGAGGTGTGTCATA   | 164                |
| TCF2/exon 2        | CTCCCACTAGTACCCTAACC       | GAGAGGGCAAAGGTCACCTCAG | 293                |
| TCF2/exon 3        | AGTGAAGGCTACAGACCCTATC     | TTCTGGGTCTGTGTACTTGC   | 367                |
| TCF2/exon 4        | CCAAGACTGCTGTGATTGTG       | CAGATAAGATCCGTGGCAAG   | 383                |
| TCF2/exon 5        | GGAGTGCCTACAGCCAG          | TCAGGTGAGAGGAGATTGTGG  | 152                |
| TCF2/exon 6        | CTGCTCTTTGTGGTCCAAGTCC     | GAGTTTGAAGGAGACCTACAG  | 290                |
| TCF2/exon 7        | ATCCACCTCTCCTTATCCAG       | ACTTCCGAGAAAGTTCAGACC  | 342                |
| TCF2/exon 8        | TTGCCTGTGTATGCACCTTG       | GCCGAGTCCATGCTTGCCAC   | 259                |
| TCF2/exon 9        | CTTTGCTGGTTGAGTTGGGC       | TTCCATGACAGCTGCCCAGAG  | 210                |
| TRIP3/exon 5       | TTATTGCTCAATCCACACCTC      | ATGGCTCCACAATTCCTAAAC  | 139                |
| AATF/exon 3        | CTGCTGAGGAACAGGAGTGT       | AGCCCTGTCTTCCTCACTCT   | 224                |
| STS-AC113211       | CAGTTCATCTCCCGAAAGACT      | GCTGTAGGGGACTTGTAAGAGG | 151                |
| MRPL45/exon 8      | AATATGAAGAGGCACAAGGAGA     | TGATGATGAGACTGCTGAAAAG | 188                |
| MEL18/exon 11      | GTGTGAGTCAGTCAGCGACA       | CTGCAGGCAGTTCAGCTAC    | 202                |
| <i>HBB/exon 1*</i> | GTGCACCTGACTCCTGAGGAGA     | CCTTGATACCAACCTGCCCAG  | 102                |

\* used as reference gene

Real time quantitative PCR was performed in a 20 µl reaction mixture containing SYBR-green I PCR master mix (applied Biosystems), 0.3 µM of each primer and 20 ng genomic DNA. Thermocycling conditions were performed according to manufacturer's recommendations.
